# Supplementary material for: CD4 T cell–activating neoantigens enhance personalized cancer vaccine efficacy
Source: PubMed Central journal article supplement (PMC10795827; doi:10.1172/jci.insight.174027), 2023-12-08
Supplement: jciinsight-8-174027-s165.pdf [file jciinsight-8-174027-s165.pdf]

Supplemental Figure 1

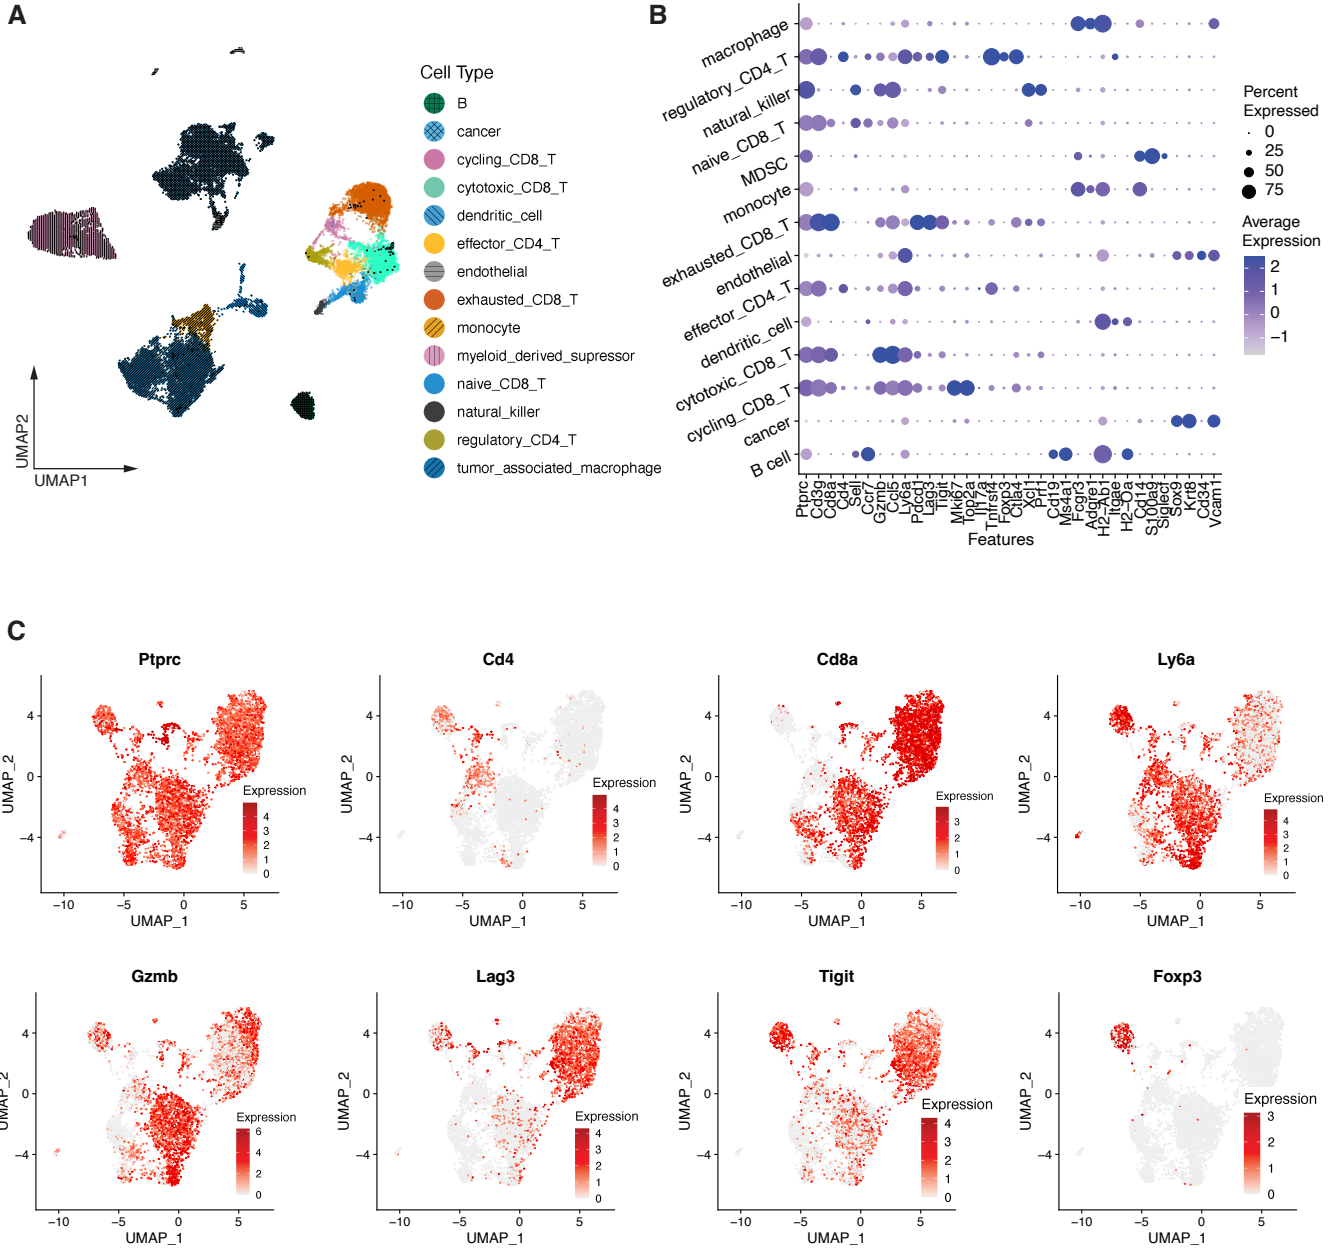

Supplemental Figure 2

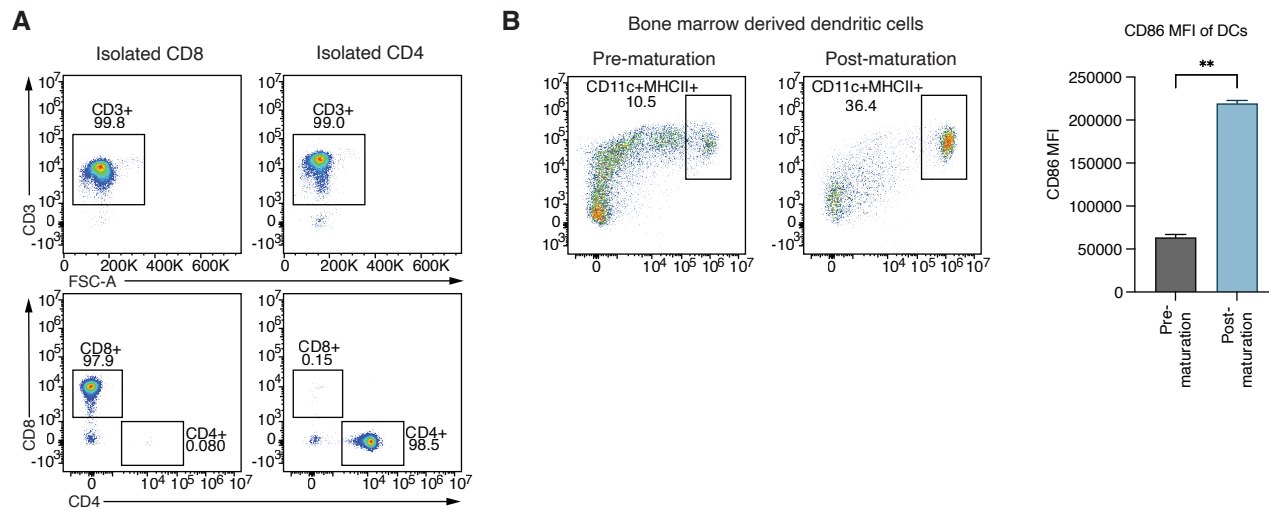

Supplemental Figure 3

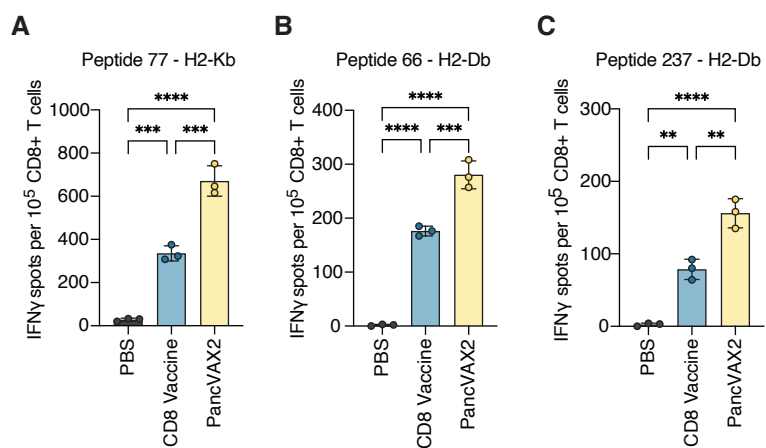

Supplemental Figure 4

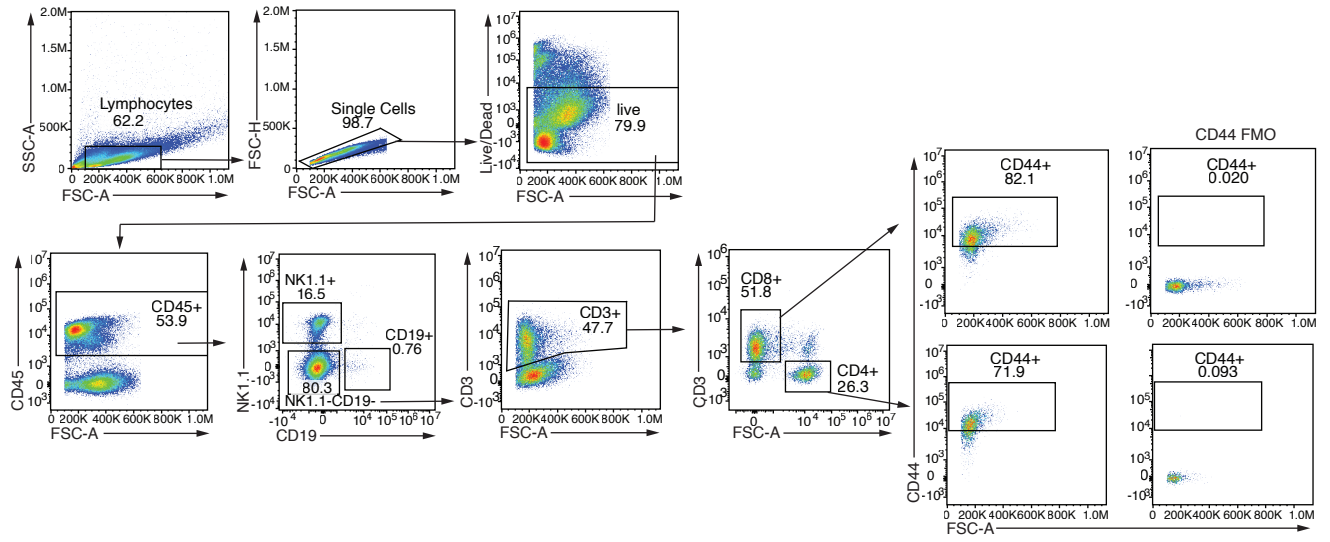

Supplemental Figure 5

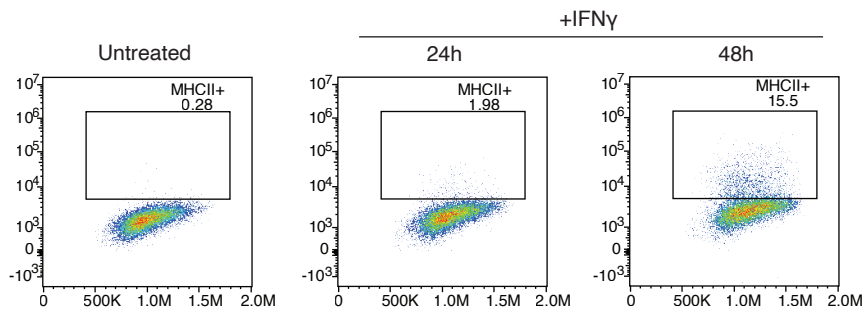

Supplemental Figure 6

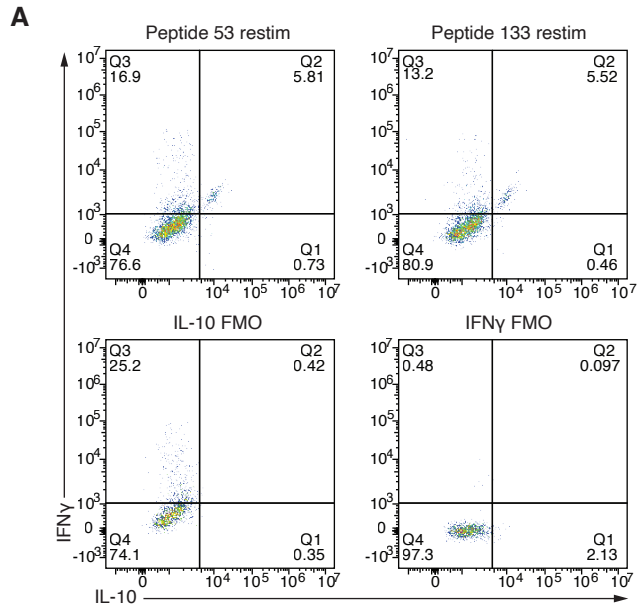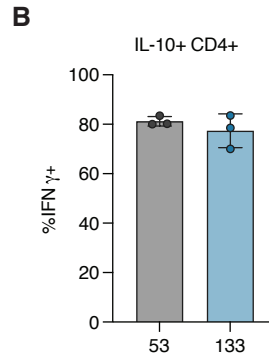

## **SUPPLEMENTAL TABLES**

**Supplemental Table 1:** MHC Class I neoantigens used in CD8 Vaccine and PancVAX2

| <b>Peptide ID</b> | <b>Gene</b> | <b>Mutation</b> | <b>SLP sequence</b>  |
|-------------------|-------------|-----------------|----------------------|
| 20                | Myo1g       | K696N           | LQGDVAFGHSNLFIRSPRTL |
| 23                | Ace         | G473A           | ALEKIAFLPFAYLVDQWRWG |
| 44                | Glb1l2      | G36C            | GSSAEESHLSCLNWSTLVPL |
| 66                | Map2k5      | A11G            | MLWLALGPFCGMENQVLVIR |
| 77                | Rasa3       | T203S           | TERIYSLFNLSMGKLEKMQE |
| 84                | Clcn7       | D771G           | ALGLRHVVVGNHNQVVGLV  |
| 94                | Notch2      | A1969S          | AELINCQADVSAVDDHGKSA |
| 175               | Bsg         | A8P             | MAAALLLPLAFTLLSGQ    |
| 219               | Ppp2r3a     | T197I           | SHRNSLDTNLISMLFQNLSE |
| 237               | Ttn         | E1901           | IKIVRLTTGSAYQFRVCAEN |

**Supplemental Table 2:** Immunogenic MHC Class II neoantigens identified in Panc02.

\*Predicted weak binder for H2-IAb by NetMHCIIpan2.3

| <b>Peptide ID</b> | <b>Gene</b> | <b>Mutation</b> | <b>SLP sequence</b>   | <b>Percent<br/>ile<br/>Rank<br/>(IEDB)</b> | <b>Predicted<br/>binding<br/>affinity for<br/>highest rank<br/>15-mer (nM)</b> | <b>Predicted<br/>binding<br/>affinity for<br/>highest rank<br/>18-mer (nM)</b> |
|-------------------|-------------|-----------------|-----------------------|--------------------------------------------|--------------------------------------------------------------------------------|--------------------------------------------------------------------------------|
| 43                | Ankrd11     | L2456V          | YAEYVITYTGSVLLDGKPLSK | 11.2                                       | 1289.1                                                                         | 820.2                                                                          |
| 53                | Zfp955b     | P23H            | EDVAVNFSLGHWALLDSYQK  | 28.98                                      | 6287.0                                                                         | 3255.8                                                                         |
| 133               | Kcnj12var2  | G216A           | DGKLCLMWRVANLRKSHIVE  | 16.06                                      | 1098.9*                                                                        | 509.3                                                                          |
| 197               | Hmcn1       | C2362           | VHVSDTGRYVWVAVNVAGMT  | 1.88                                       | 348.3*                                                                         | 247.0                                                                          |
| 230               | Tg          | R2226           | KVGTAWKQVYFLGVPYAAP   | 9.36                                       | 2095.1                                                                         | 1345.1                                                                         |
| 239               | Usp19       | P829S           | VQQRQVPSISISKCAACQR   | 10.8                                       | 1116.0*                                                                        | 643.6                                                                          |
